# Supplementary material for: The Polycomb group protein EZH2 directly controls DNA methylation
Source: Springer Nature journal article supplement (doi:10.1038/nature04431), 2005-12-14
Supplement: 41586_2006_BFnature04431_MOESM2_ESM.pdf [file 41586_2006_BFnature04431_MOESM2_ESM.pdf]

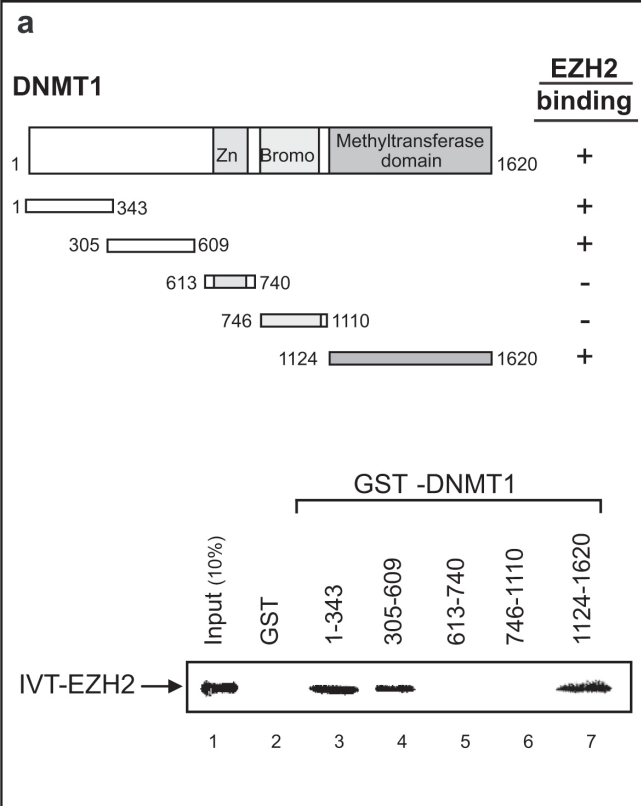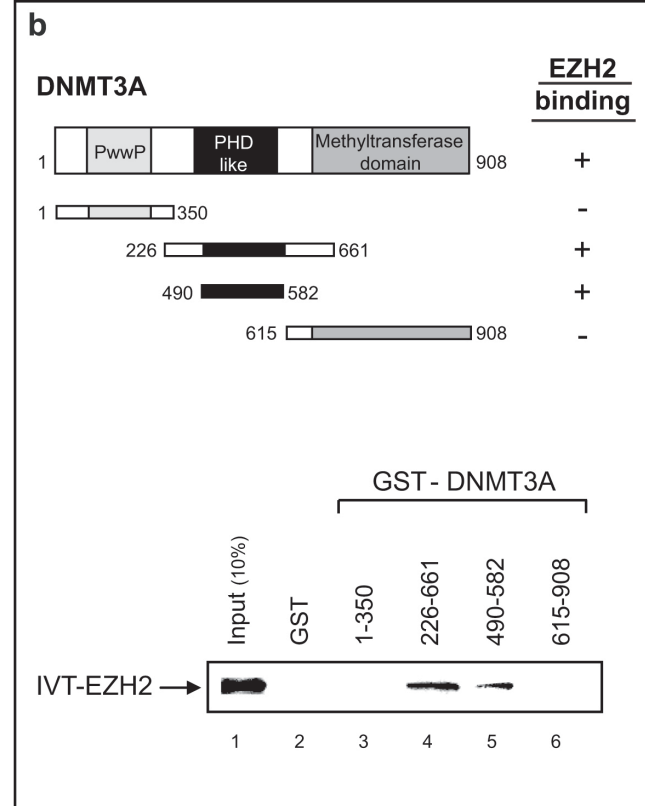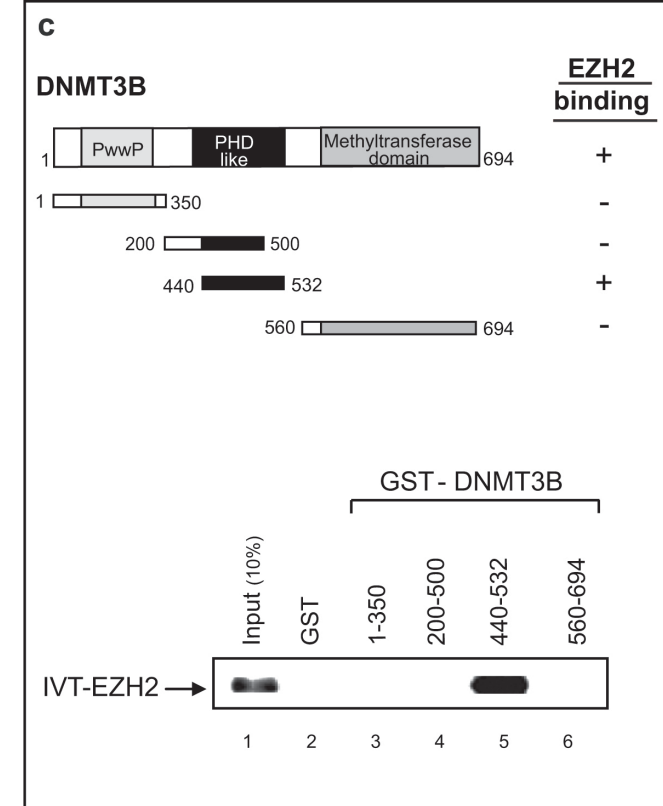

Supplementary Fig. S1.

Mapping of the interaction between DNA methyltransferases (DNMTs) and EZH2 . Representation of GST fusions of DNMT1 (a), DNMT3A (b), and DNMT3B (c). *In vitro* translated (IVT) and  $^{35}\text{S}$ -labelled full-length EZH2 was incubated with equivalent amounts of the indicated bacterially expressed GST fusions and analysed by SDS-PAGE. In lane 1 of each panel, input 10%, corresponds to 10% of the IVT product used in the GST pull-downs.
