# Supplementary material for: The Polycomb group protein EZH2 directly controls DNA methylation
Source: Springer Nature journal article supplement (doi:10.1038/nature04431), 2005-12-14
Supplement: 41586_2006_BFnature04431_MOESM3_ESM.pdf [file 41586_2006_BFnature04431_MOESM3_ESM.pdf]

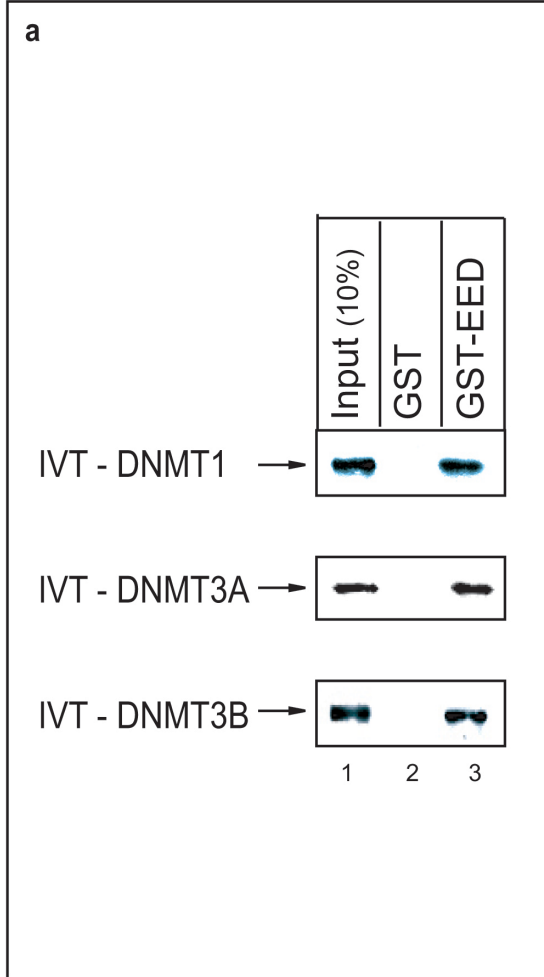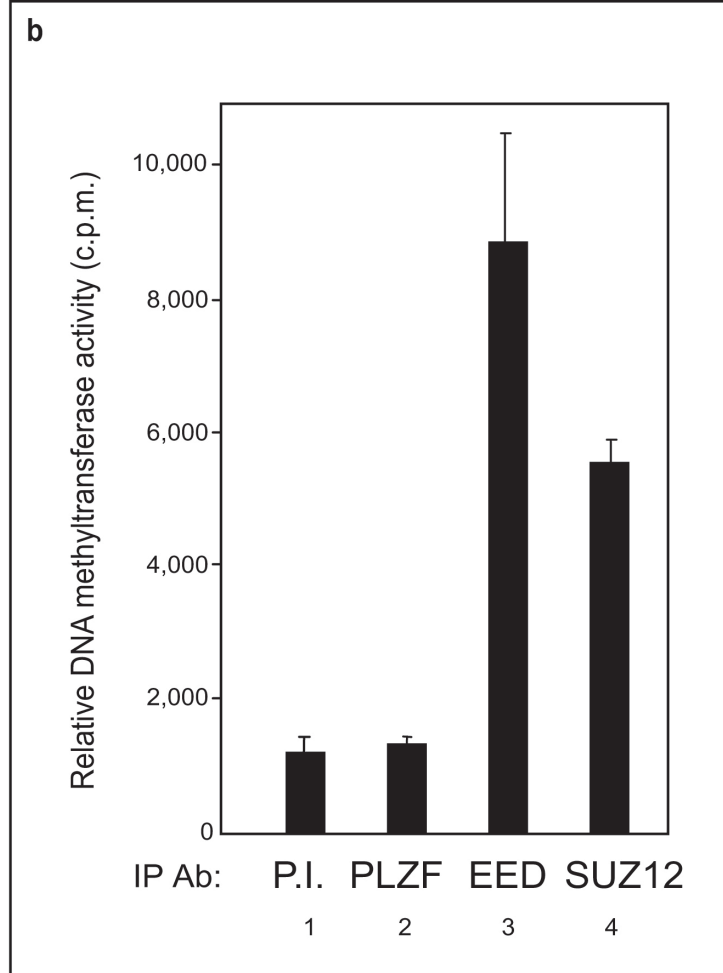

Supplementary Fig. S2.

EED and SUZ12 associate with DNA methyltransferase activity *in vivo*. **a**, A GST-EED fusion protein interacts with *in vitro* translated (IVT)  $^{35}\text{S}$ -labelled DNMT1, DNMT3A, or DNMT3B in GST pull-down assays. The bound DNMTs are indicated by an arrow on the left. Lane 1, input  $^{35}\text{S}$ -DNMT (10%) corresponds to 10% of the IVT-DNMTs used in GST pull-downs. **b**, Endogenous EED and SUZ12 purify DNMT enzymatic activity from nuclear extracts. HeLa nuclear extracts were immunoprecipitated with either pre-immune serum (lane 1) or antibodies against PLZF (used as a negative control, lane 2), EED (lane 3) (07-368, Upstate) or SUZ12 (lane 4) (ab12201, Abcam). After washing, the immune complexes were tested for DNA methyltransferase activity. IP ab, immunoprecipitation antibody. The results are averages of at least three independent experiments with error bars showing standard deviations (s.d.).
