# Supplementary material for: The Polycomb group protein EZH2 directly controls DNA methylation
Source: Springer Nature journal article supplement (doi:10.1038/nature04431), 2005-12-14
Supplement: 41586_2006_BFnature04431_MOESM4_ESM.pdf [file 41586_2006_BFnature04431_MOESM4_ESM.pdf]

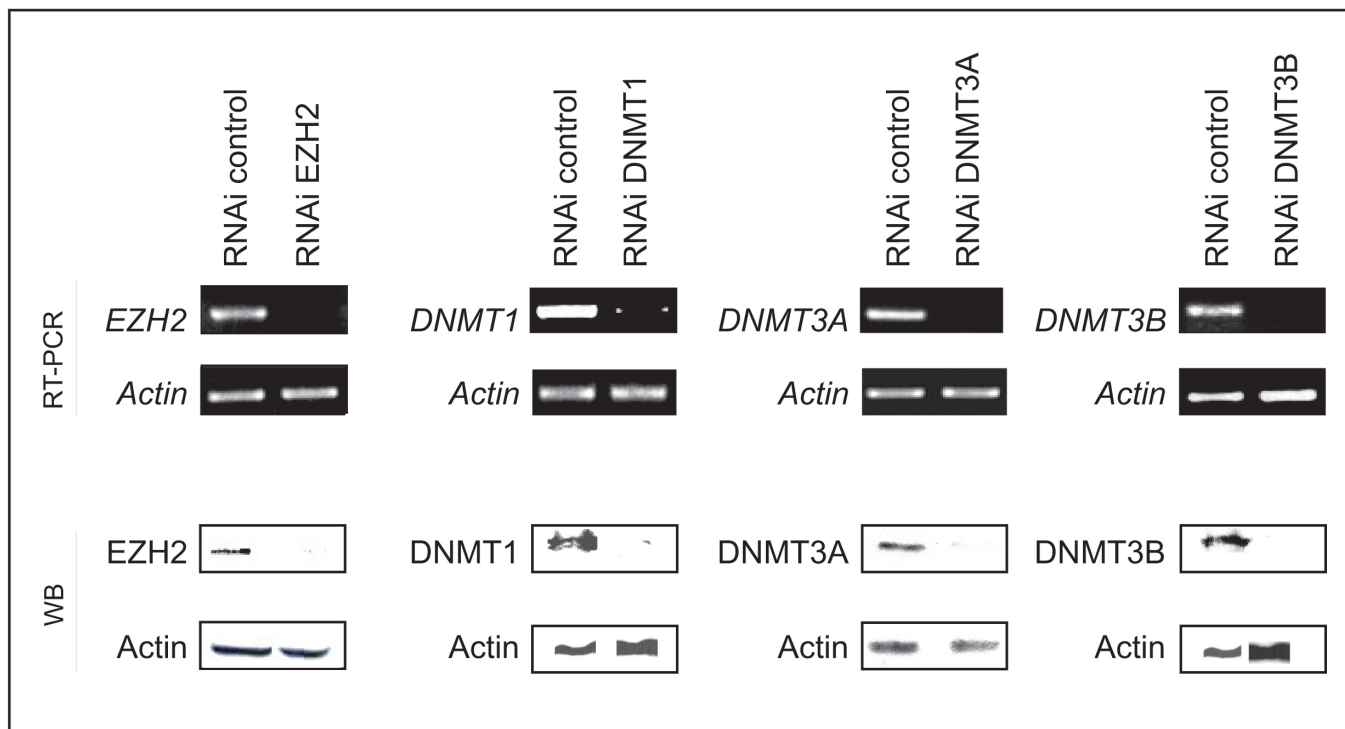

Supplementary Fig. S3.

Knock-down of endogenous EZH2 or DNMTs by RNAi. U2OS cells were infected with either the empty pRetroSUPER (pRS) retroviral vector (RNAi control) or one of the following: pRS-EZH2 (RNAi EZH2), pRS-DNMT1 (RNAi DNMT1), pRS-DNMT3A (RNAi DNMT3A), or pRS-DNMT3B (RNAi DNMT3B). RT-PCR (upper) or western blotting (bottom) were performed on the different RNAi-treated cells. Actin served as a loading control for RT-PCR and western blotting.
