# Supplementary material for: The Polycomb group protein EZH2 directly controls DNA methylation
Source: Springer Nature journal article supplement (doi:10.1038/nature04431), 2005-12-14
Supplement: 41586_2006_BFnature04431_MOESM5_ESM.pdf [file 41586_2006_BFnature04431_MOESM5_ESM.pdf]

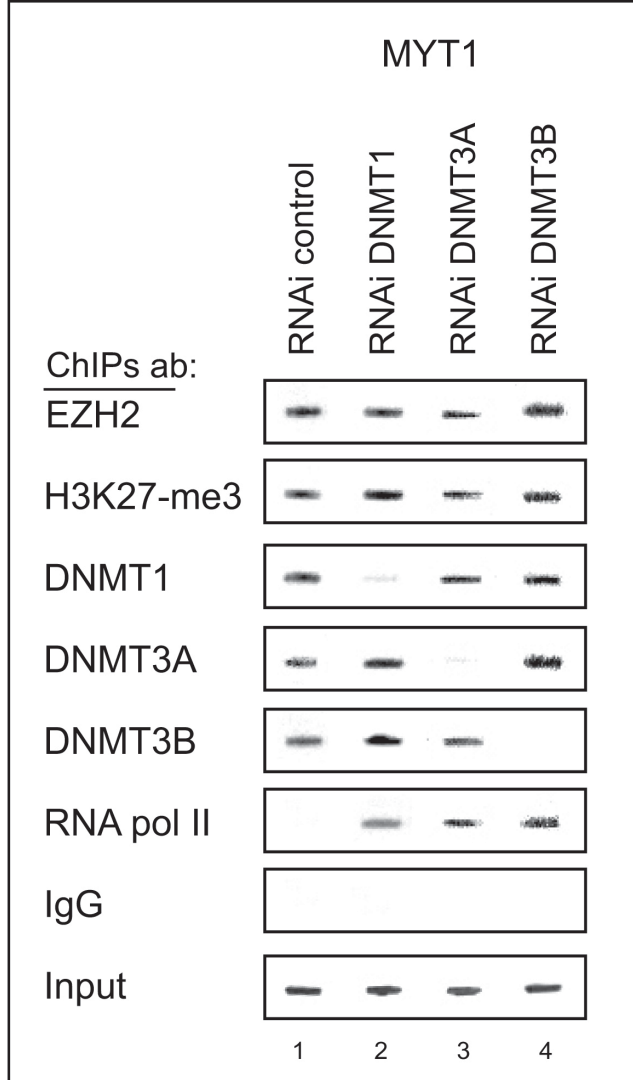

Supplementary Fig. S4.

EZH2 or H3K27me3 binding to MYT1 does not require the presence of DNMTs. ChIPs were performed using the indicated antibodies in either RNAi control, RNAi DNMT1, RNAi DNMT3A, or RNAi DNMT3B cells. Cell depletion of any of the DNMTs did not affect the level of EZH2 or H3K27me3 detected at the promoter. These data suggest that when DNMTs are removed from cells, the presence of H3K27me3 seems insufficient to maintain silencing. Equal abundance of MYT1 sequences in the RNAi control and RNAi EZH2 was determined by PCR from the input chromatin.
