# Supplementary material for: The Polycomb group protein EZH2 directly controls DNA methylation
Source: Springer Nature journal article supplement (doi:10.1038/nature04431), 2005-12-14
Supplement: 41586_2006_BFnature04431_MOESM6_ESM.pdf [file 41586_2006_BFnature04431_MOESM6_ESM.pdf]

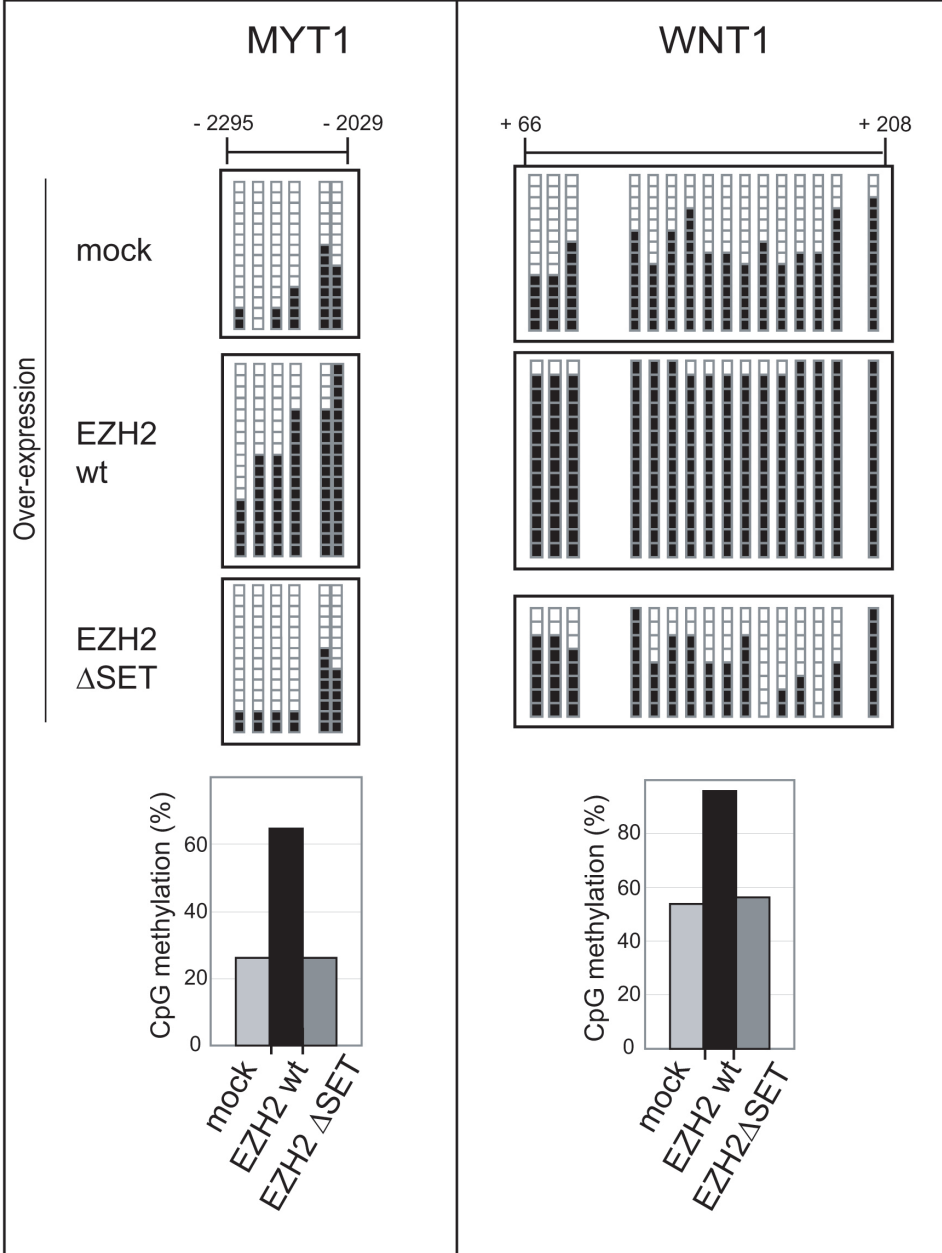

Supplementary Fig. S5.

Bisulfite sequencing indicates that EZH2 wt overexpression but not a mutant lacking the conserved SET domain (EZH2 $\Delta$ SET), significantly increases the CpG methylation status of the EZH2-target promoters MYT1 (left panel) and WNT1 (right panel). Each row represents a single sequence cloned and each square is a single CpG. White and black squares represent unmethylated and methylated CpGs, respectively.
